# Supplementary material for: Optimizing locked nucleic acid/2’-O-methyl-RNA fluorescence in situ hybridization (LNA/2’OMe-FISH) procedure for bacterial detection
Source: PLoS One. 2019 May 31;14(5):e0217689. doi: 10.1371/journal.pone.0217689 (PMC6544301; doi:10.1371/journal.pone.0217689)
Supplement: S2 Table — (DOCX) [file pone.0217689.s002.docx]

| **Assay** | **Variables** | **Range and level** | | | | |
| --- | --- | --- | --- | --- | --- | --- |
|  |  | -α | -1 | 0 | +1 | +α |
| **2b** | x1 Hybridization temperature (°C) | 55.0 | 62.1 | 72.5 | 82.9 | 90.0 |
|  | x2 [NaCl] (M) | 1.50 | 2.41 | 3.75 | 5.09 | 6.00 |
|  | x3 [Ethylene carbonate] (% V/V) | 0.00 | 0.61 | 1.50 | 2.39 | 3.00 |
| **3c** | x1 Hybridization temperature (°C) | 40.0 | 46.1 | 55.0 | 63.9 | 70.0 |
|  | x2 [NaCl] (M) | 1.50 | 2.41 | 3.75 | 5.09 | 6.00 |
|  | x3 [Ethylene carbonate] (% V/V) | 0.50 | 1.61 | 3.25 | 4.89 | 6.00 |

bExperimental levels set in the optimization protocol for *S. epidermidis*.

cExperimental levels set in the optimization protocol for *E. faecalis*.
